# Supplementary material for: The Danish OPUS Early Intervention Services for First-Episode Psychosis: A Phase 4 Prospective Cohort Study With Comparison of Randomized Trial and Real-World Data
Source: Atypon-hosted journal article supplement (doi:10.1176/appi.ajp.2021.20111596), 2021-07-28

Data supplement for Posselt et al., The Danish OPUS Early Intervention Services for First-Episode Psychosis: A Phase 4 Prospective Cohort Study With Comparison of Randomized Trial and Real-World Data. Am J Psychiatry (doi: 10.1176/appi.ajp.2020.20111596)

FIGURE S1. Estimated yearly psychiatric bed days the first 5 years after start in OPUS or standard treatment

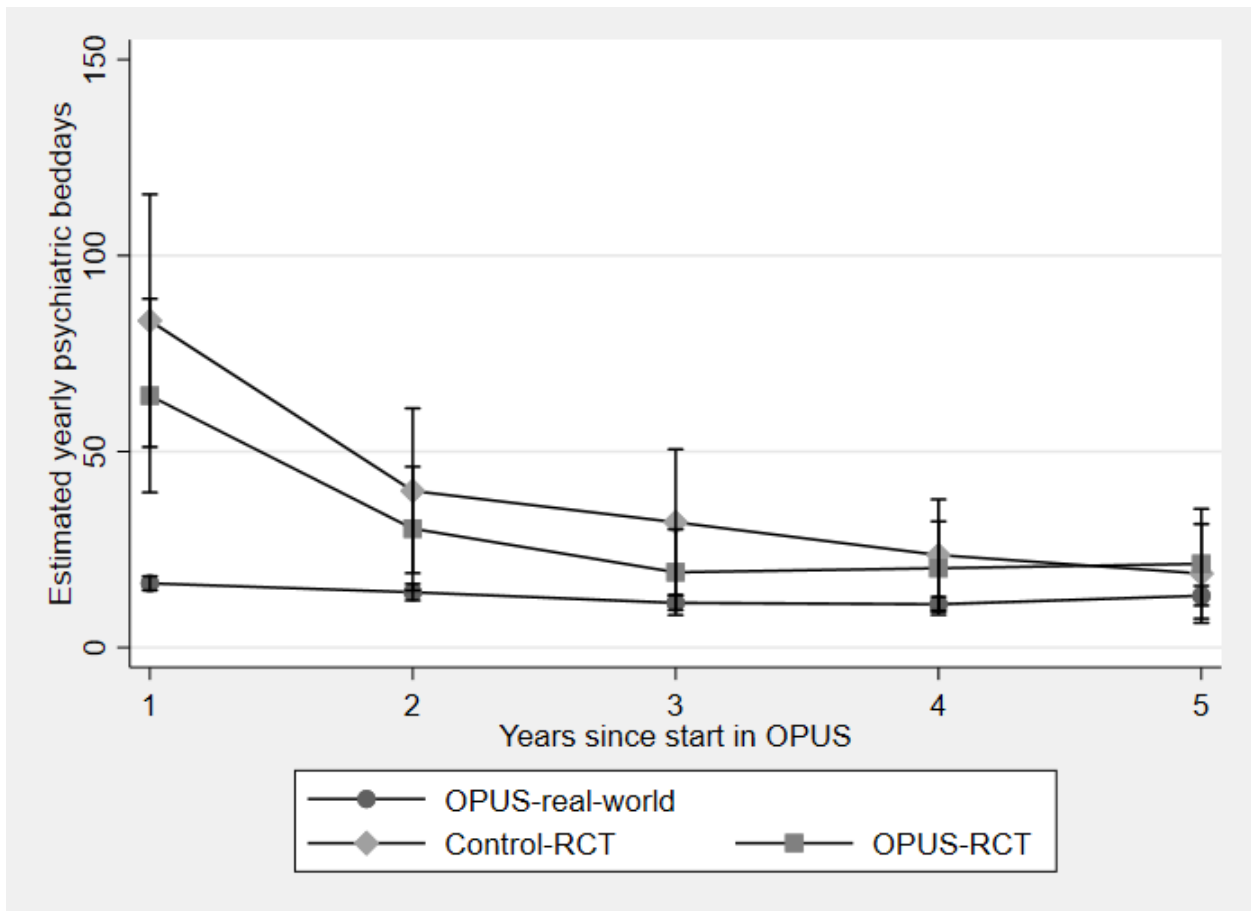

FIGURE S2. Estimated yearly nonpsychiatric bed days the first 5 years after start in OPUS or standard treatment

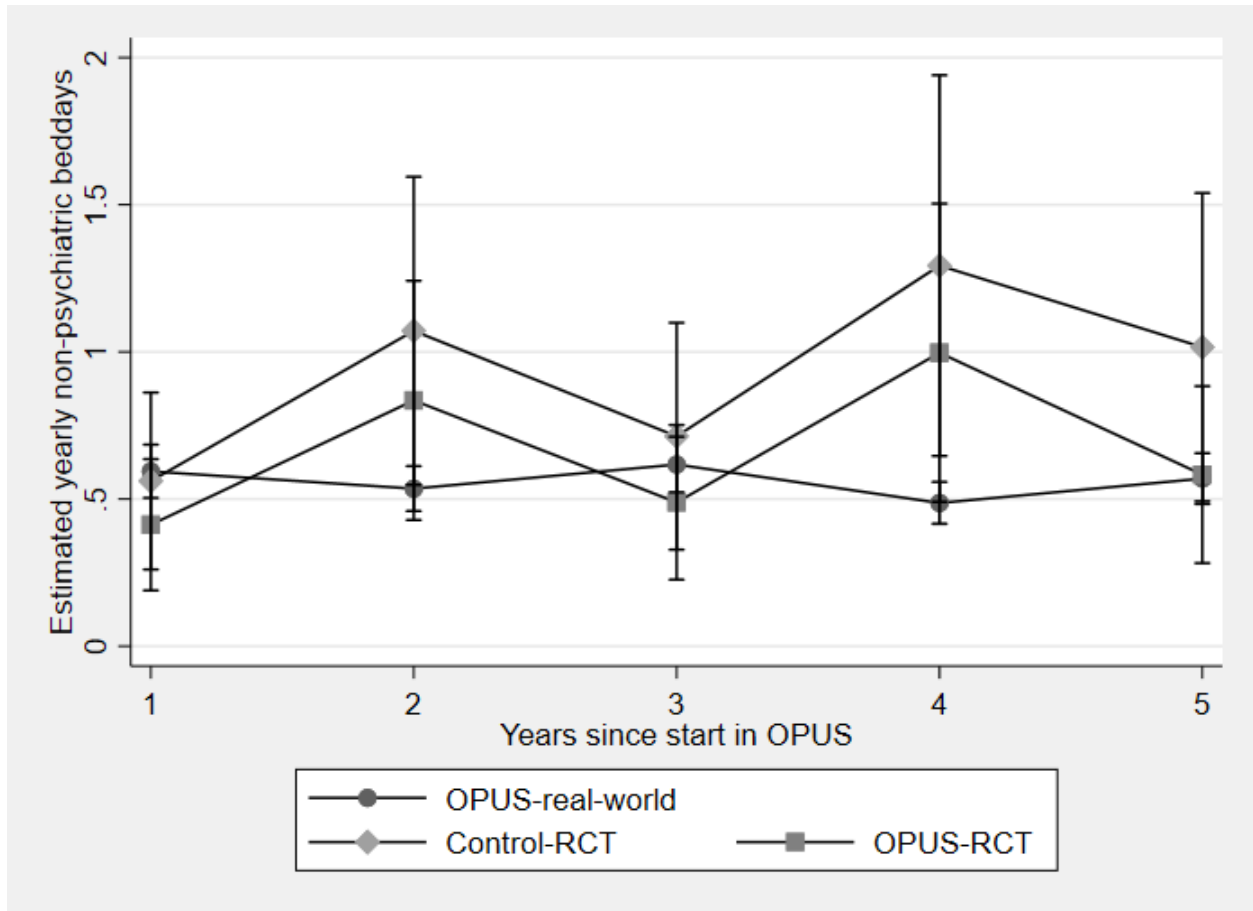

FIGURE S3. Estimated yearly psychiatric outpatient visits the first 5 years after start in OPUS or standard treatment

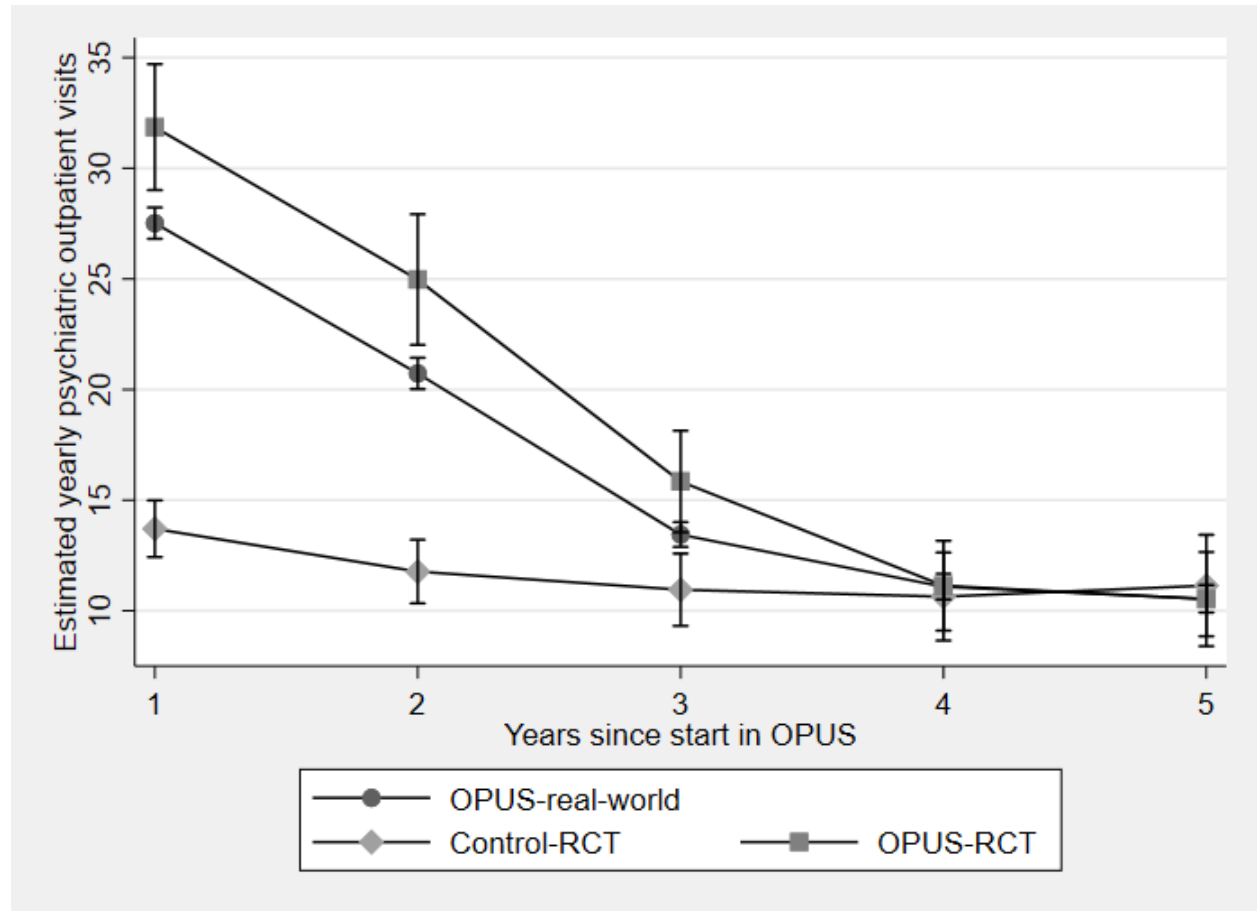

Supplement: appi.ajp.2020.20111596.ds001.pdf [file appi.ajp.2020.20111596.ds001.pdf]
